# Supplementary material for: Incidence and risk factors of new-onset sacroiliac joint pain after spinal surgery: a systematic review and meta-analysis
Source: PeerJ. 2024 Sep 26;12:e18083. doi: 10.7717/peerj.18083 (PMC11439385; doi:10.7717/peerj.18083)
Supplement: Supplemental Information 1 — All data were extracted and pooled from the included studies [file peerj-12-18083-s001.xlsx]

## Sheet:  incidence 
Author	Year	year	PMID	surgery	Caucasian	Continent	Research type	Total	No. of SIJP	Sample size	Incidence
Cho DY et al.	2013	2019 and before	24278648	lumbar interbody fusion	Asian	Asia	Retrospective	452	28	N more than or equal to 300	6.19469
Schomacher M et al.	2015	2019 and before	26397213	decompressive surgery	Caucasian	Europe	Retrospective	100	22	N less than 300	22
Unoki E et al.	2016	2019 and before	26689576	lumbar interbody fusion	Asian	Asia	Retrospective	262	28	N less than 300	10.687
Guan F et al.	2017	2019 and before	29158098	Decompression or fusion surgery	Asian	Asia	Retrospective	472	65	N more than or equal to 300	13.7712
Unoki E et al.	2019	2019 and before	31415028	Multi-segment corrective fusion	Asian	Asia	Retrospective	77	12	N less than 300	15.5844
Tonosu J et al.	2019	2019 and before	30887220	Decompression or fusion surgery	Asian	Asia	Prospective	265	8	N less than 300	3.01887
Lee YC et al.	2019	2019 and before	31663041	lumbar interbody fusion	Caucasian	Europe	Retrospective	317	38	N more than or equal to 300	11.9874
Murata S et al.	2022	After 2019	36348687	Multi-segment corrective fusion	Asian	Asia	Prospective	94	11	N less than 300	11.7021
Yan HL et al.	2022	After 2019	35813314	lumbar interbody fusion	Asian	Asia	Retrospective	409	23	N more than or equal to 300	5.62347
Kalidindi K et al.	2023	After 2019	33840263	lumbar interbody fusion	Caucasian	Asia	Retrospective	354	34	N more than or equal to 300	9.60452
Yang P et al.	2023	After 2019		lumbar interbody fusion	Asian	Asia	Retrospective	367	20	N more than or equal to 300	5.44959
Xu HW et al.	2024	After 2019		lumbar interbody fusion	Asian	Asia	Prospective	401	36	N more than or equal to 300	8.97756
						gen p= NoofSIJP / total gen se=sqrt(p*(1-p)/ total ) metan p se, lcols( author year NoofSIJP total ) random second(fixed) eff(Proportion) forestplot(xlabel(0 0.1 0.2 0.3) dp(4) texts(140) astext(80) graphregion(margin(tiny)) aspect(0.5) title(Incidence of new-onset SIJP))
Patients	Group	Subgroups	Proportion	LCI	UCI	Studies	SE
3570	Incidence of new-onset SIJP	Overall	0.094	0.0708	0.1172	12	0.0118367
1286	1 Date of study publication	2019 and before	0.1103	0.0694	0.1512	7	0.0208673
2284	1 Date of study publication	After 2019	0.076	0.0552	0.0967	5	0.0105867
3153	2 Continent	Asia	0.0837	0.0612	0.1062	10	0.0114796
417	2 Continent	Europe	0.163	0.0658	0.2602	2	0.0495918
2799	3 Ethnicity	Asian	0.0825	0.0581	0.1068	9	0.0124235
771	3 Ethnicity	Caucasian	0.1316	0.0811	0.182	3	0.0257398
2810	4 Type of study	Retrospective	0.1011	0.0747	0.1276	9	0.0134949
760	4 Type of study	Prospective	0.0736	0.022	0.1253	3	0.026352
2772	5 Sample size	N more than or equal to 300	0.0861	0.063	0.1092	7	0.0117857
798	5 Sample size	N less than 300	0.1191	0.0545	0.1837	5	0.0329592
2562	6 Type of surgery	Lumbar interbody fusion	0.0804	0.062	0.0988	7	0.00938776
100	6 Type of surgery	Decompression	0.22	0.1388	0.3012	1	0.0414286
171	6 Type of surgery	Multisegment corrective fusion	0.1322	0.0815	0.1829	2	0.0258673
737	6 Type of surgery	Decompression or fusion	0.0833	-0.0221	0.1887	2	0.0537755
	set scheme white_tableau			format proportion se %10.4f metan proportion se, lcols(subgroups studies patients ) rcols( se ) by( group ) effect(Proportion) nooverall nosubgroup forestplot(dp(4) texts(130) astext(80) xlabel(0 .1 .2 .3) graphregion(margin(tiny)) aspect(0.6) title(Subgroup analyses for incidence of new-onset SIJP))

## Sheet: gender
Author	Year	Research type	surgery type	SIJP Total	noSIJP Total	Events	_Events	_ES	_LCI	_UCI					类型
Cho DY et al.	2013	Retrospective	Posterior lumbar interbody fusion (PLIF)	28	56	18	36	1	0.387999	2.57733
Schomacher M et al.	2015	Retrospective	Decompression	22	78	16	37	2.95495	1.04633	8.34514
Unoki E et al.	2016	Retrospective	Lumbar fusion surgery	28	234	24	138	4.17391	1.40322	12.4154
Guan F et al.	2017	Retrospective	Lumbar open diskectomy(40.9%) /PLIF(59.1%)	65	407	30	161	1.30967	0.773525	2.21743
Unoki E et al.	2019	Retrospective	Multi-segment corrective fusion≥3	12	65	11	48	3.89583	0.467372	32.4742
Tonosu J et al.	2019	Prospective	Anterior and posterior lumbar spine surgeries(Fixation surgery 34.0%)	8	257	3	95	1.02316	0.239142	4.37753
Lee YC et al.	2019	Retrospective	Lumbar fusion surgery	38	279	27	147	2.20408	1.05221	4.61691
Murata S et al.	2022	Prospective	Long corrective fusion with Lumbosacral PLIF	11	83	10	79	0.51	0.07	10.42
Yan HL et al.	2022	Retrospective	Posterior thoracolumbar fusion	23	386	15	216	1.47569	0.611308	3.56232
Kalidindi K et al.	2023	Retrospective	Transforaminal Lumbar Interbody Fusion(TLIF) involving L4-L5/L5-S1
Yang P et al.	2023			20	347	12	175	1.47429	0.58811	3.69577
Xu HW et al.	2024			36	365	20	170	1.43382	0.720027	2.85524
				291	2557
		set scheme white_tableau	label variable _events "Events" gen logor=log( _es ) gen loglci=log( _lci ) gen loguci=log( _uci ) gen selogor=((loguci-loglci)/(1.96*2)) metan logor loglci loguci, lcols( author year sijptotal events nosijptotal _events) fixed second(random) effect(OR) eform forestplot(texts(140) astext(80) graphregion(margin(tiny)) aspect(0.4) title(Sex/female))

## Sheet: age
Author	Year	Research type	N	NN	SIJP Mean	SD	NoSIJP Mean	_SD
Cho DY et al.	2013	Retrospective	28	56	64.28	7.67	62.31	7.99
Schomacher M et al.	2015	Retrospective	22	78	71	7.8	70.9	9.8
Unoki E et al.	2016	Retrospective	28	234
Guan F et al.	2017	Retrospective	65	407
Unoki E et al.	2019	Retrospective	12	65
Tonosu J et al.	2019	Prospective	8	257	66.9	15.1	63.2	15.5
Lee YC et al.	2019	Retrospective	38	279
Murata S et al.	2022	Prospective	11	83	72.1	4.7	71.9	6.4
Yan HL et al.	2022	Retrospective	23	386	64.1	8	61.2	11.4
Kalidindi K et al.	2023	Retrospective	34	320
Yang P et al.	2023	Retrospective	20	347	46.75	14.49	51.59	12.83
Author	Year	Mean age of all patients ＞70 years	N	NN	SIJP Mean	SD	NoSIJP Mean	_SD
Cho DY et al.	2013	Mean age of all patients ＜70 years	28	56	64.28	7.67	62.31	7.99
Schomacher M et al.	2015	Mean age of all patients ＞70 years	22	78	71	7.8	70.9	9.8
Tonosu J et al.	2019	Mean age of all patients ＜70 years	8	257	66.9	15.1	63.2	15.5
Murata S et al.	2022	Mean age of all patients ＞70 years	11	83	71.9	6.4	72.1	4.7
Yan HL et al.	2022	Mean age of all patients ＜70 years	23	386	64.1	8	61.2	11.4
Yang P et al.	2023		20	347	46.75	14.49	51.59	12.83
Xu HW et al.	2024		36	365	63.89	4.3	62.53	9.83
			148	1572
			label variable nn "N" label variable _sd "SD" format sijpmean sd nosijpmean _sd %10.2f metan n sijpmean sd nn nosijpmean _sd , fixed second(random) nostandard lcols( author year n sijpmean sd nn nosijpmean _sd ) forestplot(texts(160) astext(80) graphregion(margin(tiny)) aspect(0.45) title(Age))

## Sheet: Preoperative diagnosis
Author	Year	Research type	subgroup	SIJP Total	noSIJP Total	Events	_Events	spinal stenosis	degenerative spondylolisthesis	Spondylolytic spondylolisthesis	lumbar degenerative kyphosis	lumbar degenerative kyphoscoliosis	lumbar degenerative scoliosis	Lumbar disk herniation	_ES	_LCI	_UCI				_ES	_LCI	_UCI
Unoki E et al.	2016	Retrospective	Lumbar disk herniation	28	234	1	23	3/39	103	19	3/29	4/18	5/16	1/25	0.339774	0.0441008	2.61779
Guan F et al.	2017	Retrospective	Lumbar disk herniation	65	407	18	159	29/140	Lumbar spondylolisthesis21/105					15/162	0.597351	0.334919	1.06542				0.597351	0.334919	1.06542
Tonosu J et al.	2019	Prospective	Lumbar disk herniation	8	257	1	69	7/170		0/4	Adult spine deformity0/5			1/69	0.389234	0.047031	3.22134				0.389234	0.047031	3.22134
Xu HW et al.	2024		Lumbar disk herniation	36	365	16	121								1.61322	0.807076	3.22459
Cho DY et al.	2013	Retrospective	Spondylolisthesis	28	56	15	28	9/21	8/14	7/14	4/7				1.15385	0.464992	2.86319				1.15385	0.464992	2.86319
Unoki E et al.	2016	Retrospective	Spondylolisthesis	28	234	5	93	3/39	5/122	19	3/29	4/18	5/16	1/25	0.329593	0.121017	0.897657
Guan F et al.	2017	Retrospective	Spondylolisthesis	65	407	18	108	29/140	Lumbar spondylolisthesis21/105					15/162	1.06028	0.590015	1.90538				1.06028	0.590015	1.90538
Tonosu J et al.	2019	Prospective	Spondylolisthesis	8	257	0	4	7/170		0/4	Adult spine deformity0/5			1/69	3.31372	0.16488	66.5986				3.31372	0.16488	66.5986
Xu HW et al.	2024		Spondylolisthesis	36	365	10	110								0.891608	0.415805	1.91187
Cho DY et al.	2013	Retrospective	Spinal stenosis	28	56	9	21	9/21	8/14	7/14	4/7				0.789474	0.302269	2.06197				0.789474	0.302269	2.06197
Unoki E et al.	2016	Retrospective	Spinal stenosis	28	234	3	38	3/39	103	19	3/29	4/18	5/16	1/25	0.618947	0.177877	2.15372
Guan F et al.	2017	Retrospective	Spinal stenosis	65	407	29	140	29/140	Lumbar spondylolisthesis21/105					15/162	1.53631	0.904196	2.61033				1.53631	0.904196	2.61033
Tonosu J et al.	2019	Prospective	Spinal stenosis	8	257	7	170	7/170		0/4	Adult spine deformity0/5			1/69	3.58235	0.433814	29.5824				3.58235	0.433814	29.5824
Xu HW et al.	2024		Spinal stenosis	36	365	10	134								0.663031	0.310161	1.41736
Cho DY et al.	2013	Retrospective	Lumbar degenerative kyphosis	28	56	4	7	9/21	8/14	7/14	4/7				1.16667	0.311045	4.37593				1.16667	0.311045	4.37593
Unoki E et al.	2016	Retrospective	Lumbar degenerative kyphosis	28	234	3	26	3/39	103	19	3/29	4/18	5/16	1/25	0.96	0.270935	3.40155
Unoki E et al.	2019	Retrospective	Lumbar degenerative kyphosis	12	65	3	21				3/21	5/33	4/11		0.698413	0.171153	2.84997				0.698413	0.171153	2.84997
Murata S et al.	2022	Prospective	Lumbar degenerative kyphosis	11	83	7	51				7/51	4/32			1.09804	0.297588	4.05154				1.09804	0.297588	4.05154
Unoki E et al.	2016	Retrospective	Lumbar degenerative kyphoscoliosis	28	234	4	17	3/39	103	19	3/29	4/18	5/16	1/25	2.12745	0.661649	6.84056
Unoki E et al.	2019	Retrospective	Lumbar degenerative kyphoscoliosis	12	65	5	33				3/21	5/33	4/11		0.692641	0.19916	2.40888				0.692641	0.19916	2.40888
Murata S et al.	2022	Prospective	Lumbar degenerative kyphoscoliosis	11	83	4	32				7/51	4/32			0.910714	0.24682	3.36035				0.910714	0.24682	3.36035
Unoki E et al.	2016	Retrospective	Lumbar degenerative scoliosis	28	234	5	14	3/39	5/122	19	3/29	4/18	5/16	1/25	3.41615	1.12833	10.3428
Unoki E et al.	2019	Retrospective	Lumbar degenerative scoliosis	12	65	4	11				3/21	5/33	4/11		2.45454	0.627376	9.60317				2.45454	0.627376	9.60317
			label variable _events "Events" gen logor=log( _es ) gen loglci=log( _lci ) gen loguci=log( _uci ) gen selogor=((loguci-loglci)/(1.96*2)) metan9 logor loglci loguci, lcols( author year sijptotal events nosijptotal _events) fixed second(random) effect(OR) eform texts(145) astext(80) graphregion(margin(tiny)) aspect(1.2) nooverall by( subgroup) title(Preoperative diagnosis)
Lumbar-disk-herniation Author	Year	Research type	subgroup	SIJP Total	noSIJP Total	Events	_Events	spinal stenosis	degenerative spondylolisthesis	Spondylolytic spondylolisthesis	lumbar degenerative kyphosis	lumbar degenerative kyphoscoliosis	lumbar degenerative scoliosis	Lumbar disk herniation	_ES	_LCI	_UCI
Unoki et al.	2016	Retrospective	Lumbar disk herniation	28	234	1	23	3/39	103	19	3/29	4/18	5/16	1/25	0.339774	0.0441008	2.61779
Guan et al.	2017	Retrospective	Lumbar disk herniation	65	407	18	159	29/140	Lumbar spondylolisthesis21/105					15/162	0.597351	0.334919	1.06542
Tonosu et al.	2019	Prospective	Lumbar disk herniation	8	257	1	69	7/170		0/4	Adult spine deformity0/5			1/69	0.389234	0.047031	3.22134
Unoki et al.	2016	Retrospective	Lumbar degenerative scoliosis	28	234	5	16	3/39	5/122	19	3/29	4/18	5/16	1/25	2.96196	0.993614	8.82957
Unoki et al.	2019	Retrospective	Lumbar degenerative scoliosis	12	65	4	11				3/21	5/33	4/11		2.45454	0.627376	9.60317
			label variable _events "Events" gen logor=log( _es ) gen loglci=log( _lci ) gen loguci=log( _uci ) gen selogor=((loguci-loglci)/(1.96*2)) metan logor loglci loguci, lcols( lumbardiskherniationauthor year sijptotal events nosijptotal _events) fixed second(random) effect(OR) eform texts(280) astext(80) graphregion(margin(tiny)) aspect(0.618) title(Preoperative diagnosis)
Lumbar-degenerative-kyphosis Author	Year	Research type	subgroup	SIJP Total	noSIJP Total	Events	_Events	spinal stenosis	degenerative spondylolisthesis	Spondylolytic spondylolisthesis	lumbar degenerative kyphosis			Lumbar disk herniation	_ES	_LCI	_UCI
Cho et al.	2013	Retrospective	Lumbar degenerative kyphosis	28	56	4	7	9/21	8/14	7/14	4/7				1.16667	0.311045	4.37593
Unoki et al.	2016	Retrospective	Lumbar degenerative kyphosis	28	234	3	29	3/39	103	19	3/29	4/18	5/16	1/25	0.848276	0.240832	2.98786
Unoki et al.	2019	Retrospective	Lumbar degenerative kyphosis	12	65	3	21				3/21	5/33	4/11		0.698413	0.171153	2.84997
Murata et al.	2022	Prospective	Lumbar degenerative kyphosis	11	83	7	51				7/51	4/32			1.09804	0.297588	4.05154
			gen logor=log( _es ) gen loglci=log( _lci ) gen loguci=log( _uci ) gen selogor=((loguci-loglci)/(1.96*2)) metan logor loglci loguci, lcols( lumbardegenerativekyphosisauthor year sijptotal events nosijptotal _events) fixed second(rand > om) effect(OR) eform texts(280) astext(80) graphregion(margin(tiny)) aspect(0.618)
Lumbar-degenerative-kyphoscoliosis Author	Year	Research type	subgroup	SIJP Total	noSIJP Total	Events	_Events	spinal stenosis	degenerative spondylolisthesis	Spondylolytic spondylolisthesis	lumbar degenerative kyphosis	lumbar degenerative kyphoscoliosis	lumbar degenerative scoliosis	Lumbar disk herniation	_ES	_LCI	_UCI
Unoki et al.	2016	Retrospective	Lumbar degenerative kyphoscoliosis	28	234	4	18	3/39	103	19	3/29	4/18	5/16	1/25	2	0.625348	6.39644
Unoki et al.	2019	Retrospective	Lumbar degenerative kyphoscoliosis	12	65	5	33				3/21	5/33	4/11		0.692641	0.19916	2.40888
Murata et al.	2022	Prospective	Lumbar degenerative kyphoscoliosis	11	83	4	32				7/51	4/32			0.910714	0.24682	3.36035
			gen logor=log( _es ) gen loglci=log( _lci ) gen loguci=log( _uci ) gen selogor=((loguci-loglci)/(1.96*2)) metan logor loglci loguci, lcols( lumbardegenerativekyphosisauthor year sijptotal events nosijptotal _events) fixed second(rand > om) effect(OR) eform texts(280) astext(80) graphregion(margin(tiny)) aspect(0.618)
Spondylolisthesis Author	Year	Research type	subgroup	SIJP Total	noSIJP Total	Events	_Events	spinal stenosis	degenerative spondylolisthesis	Spondylolytic spondylolisthesis	lumbar degenerative kyphosis	lumbar degenerative kyphoscoliosis	lumbar degenerative scoliosis	Lumbar disk herniation	_ES	_LCI	_UCI
Cho et al.	2013	Retrospective	Spondylolisthesis	28	56	15	28	9/21	8/14	7/14	4/7				1.15385	0.464992	2.86319
Unoki et al.	2016	Retrospective	Spondylolisthesis	28	234	5	122	3/39	5/122	19	3/29	4/18	5/16	1/25	0.199572	0.0733783	0.542792
Guan et al.	2017	Retrospective	Spondylolisthesis	65	407	18	108	29/140	Lumbar spondylolisthesis21/105					15/162	1.06028	0.590015	1.90538
Tonosu et al.	2019	Prospective	Spondylolisthesis	8	257	0	4	7/170		0/4	Adult spine deformity0/5			1/69	3.31372	0.16488	66.5986

## Sheet: No. of surgical segments
Author	Year	Research type	SIJP Total	noSIJP Total	Events	_Events	_ES	_LCI	_UCI	RR
Cho DY et al.	2013	Retrospective	28	56
Schomacher M et al.	2015	Retrospective	22	78	10	32
Unoki E et al.	2016	Retrospective	28	234	20	105	1.701	1.226	2.359	3.07143
Guan F et al.	2017	Retrospective	65	407	32	118
Unoki E et al.	2019	Retrospective	12	65
Tonosu J et al.	2019	Prospective	8	257
Lee YC et al.	2019	Retrospective	38	279	23	159
Murata S et al.	2022	Prospective	11	83			2.88	0.86	9.77
Yan HL et al.	2022	Retrospective	23	386	17	233
Kalidindi K et al.	2023	Retrospective	34	320	18	120
Yang P et al.	2023		20	347
Author	Year	Research type	subgroup	SIJP Total	noSIJP Total	Events	_Events	_ES	_LCI	_UCI	RR		_ES	_LCI	_UCI	Total
Schomacher M et al.	2015	Retrospective	Equal or more than two	22	78	10	32	1.19792	0.461989	3.10614			1.19792	0.461989	3.10614	100
Unoki E et al.	2016	Retrospective	Equal or more than two	28	234	20	105	3.07143	1.30045	7.25414	0.325581		3.07143	1.30045	7.25414	262
Guan F et al.	2017	Retrospective	Equal or more than two	65	407	22	128	1.11519	0.64037	1.94207			1.11519	0.64037	1.94207	472
Lee YC et al.	2019	Retrospective	Equal or more than two	38	279	23	159	1.15723	0.579102	2.31252			1.15723	0.579102	2.31252	317
Yan HL et al.	2022	Retrospective	Equal or more than two	23	386	17	233	1.86051	0.717534	4.82418			1.86051	0.717534	4.82418	409
Kalidindi K et al.	2023	Retrospective	Equal or more than two	34	320	18	120	1.875	0.921427	3.81541			1.875	0.921427	3.81541	354
Yang P et al.	2023	Retrospective	Equal or more than two	20	347	8	112	1.39881	0.556078	3.5187
Unoki E et al.	2016	Retrospective	Equal or more than three	28	234	14	51	3.58824	1.60718	8.01118	0.325581		3.58824	1.60718	8.01118	262
Guan F et al.	2017	Retrospective	Equal or more than three	65	407	7	36	1.24377	0.528632	2.92637			1.24377	0.528632	2.92637	472
Lee YC et al.	2019	Retrospective	Equal or more than three	38	279	10	64	1.19978	0.553239	2.60188			1.19978	0.553239	2.60188	317
Yan HL et al.	2022	Retrospective	Equal or more than three	23	386	11	91	2.97161	1.26856	6.96103			2.97161	1.26856	6.96103	409
Kalidindi K et al.	2023	Retrospective	Equal or more than three	34	320	7	32	2.33333	0.941116	5.78509			2.33333	0.941116	5.78509	354			_ES	_LCI	_UCI
Yang P et al.	2023		Equal or more than three	20	347	0	15	0.52321	0.0302266	9.05656
Xu HW et al.	2024		Equal or more than three	36	365	17	106	2.1862	1.09407	4.36851
Unoki E et al.	2016	Retrospective	Equal or more than four	28	234	9	31	3.10187	1.28847	7.46746	0.325581		3.10187	1.28847	7.46746	262
Guan F et al.	2017	Retrospective	Equal or more than four	65	407	4	4	6.60656	1.61001	27.1095			6.60656	1.61001	27.1095	472
Lee YC et al.	2019	Retrospective	Equal or more than four	38	279	6	37	1.22635	0.47997	3.1334			1.22635	0.47997	3.1334	317
			label variable _events "Events" gen logor=log( _es ) gen loglci=log( _lci ) gen loguci=log( _uci ) gen selogor=((loguci-loglci)/(1.96*2)) metan9 logor loglci loguci, lcols( author year sijptotal events nosijptotal _events) random second(fixed) effect(OR) eform texts(150) astext(80) graphregion(margin(tiny)) aspect(0.6) nooverall by(subgroup) title(No. of surgical segments)

## Sheet: Fusion to sacrum
	Multi-segment Author	Year	Research type		SIJP Total	noSIJP Total	Events	_Events	_ES	_LCI	_UCI
1	Cho DY et al.	2013	Retrospective		28	56	10	20
2	Schomacher M et al.	2015	Retrospective		22	78
3	Unoki E et al.	2016	Retrospective		28	234	8	53	1.326	0.542	3.244
4	Guan F et al.	2017	Retrospective		75	397
5	Unoki E et al.	2019	Retrospective		12	65	7	40
6	Tonosu J et al.	2019	Prospective		8	257	0	30	0.438766	0.0247016	7.79364
7	Lee YC et al.	2019	Retrospective		38	279	22	152	174.35	27	147.35
8	Murata S et al.	2022	Prospective		11	83
9	Yan HL et al.	2022	Retrospective		23	386	18	195
#REF!	Kalidindi K et al.	2023	Retrospective		34	320
	Yang P et al.	2023			20	347
	Author	Year	Research type	subgroup	SIJP Total	noSIJP Total	Events	_Events	_ES	_LCI	_UCI		_ES	_LCI	_UCI
1	Cho DY et al.	2013	cOR	Non-multisegmental fusion	28	56	10	20	1	0.387999	2.57733		1	0.387999	2.57733
3	Unoki E et al.	2016	aOR	Non-multisegmental fusion	28	234	8	53	1.326	0.542	3.244		1.36604	0.569341	3.27758
5	Unoki E et al.	2019	cOR	Multisegmental fusion	11	42	6	17	1.76471	0.463366	6.72079		1.76471	0.463366	6.72079
7	Lee YC et al.	2019	cOR	Non-multisegmental fusion	38	279	22	152	1.14885	0.578702	2.28071		1.14885	0.578702	2.28071
9	Yan HL et al.	2022	cOR	Non-multisegmental fusion	23	386	18	195	3.52615	1.28339	9.68821		3.52615	1.28339	9.68821
	Yang P et al.	2023	aOR		20	347	13	133	2.63158	0.934579	7.14286		2.98819	1.16262	7.68025
	Xu HW et al.	2024	cOR		36	365	15	86	2.31728	1.14463	4.69126
			label variable _events "Events" gen logor=log( _es ) gen loglci=log( _lci ) gen loguci=log( _uci ) gen selogor=((loguci-loglci)/(1.96*2)) metan logor loglci loguci, lcols( author year sijptotal events nosijptotal _events) fixed second(random) effect(OR) eform forestplot(texts(160) astext(80) graphregion(margin(tiny)) aspect(0.6) tit("Fusion to sacrum"))		184	1709

## Sheet: spondylopelvic parameters
Preoperative spondylopelvic parameters
Author	Year	subgroup	N	NN	SIJP Mean	SD	NoSIJP Mean	_SD
Cho DY et al.	2013	LL	28	56	37.97	14.49	38.13	14.03
Tonosu J et al.	2019	LL	8	257	40.4	10.4	36.8	14.1
Murata S et al.	2022	LL	11	83	7.2	19.4	5.2	22.5
Kalidindi K et al.	2023	LL	34	320	46.46	10.38	62.25	7.34
Yang P et al.	2023	LL	20	347	30.96	14.76	37.68	36.4
Xu HW et al.	2024	LL	36	72	40.42	9.49	41.02	11.85
Cho DY et al.	2013	PI	28	56	56.94	13.02	55.48	12.24
Tonosu J et al.	2019	PI	8	257	59.6	12.2	49.9	10.4
Murata S et al.	2022	PI	11	83	47.1	11.3	50.8	9.7
Yang P et al.	2023	PI	20	347	55.73	12.93	55.43	14.57
Xu HW et al.	2024	PI	36	72	55.55	11.34	48.85	13.5
Cho DY et al.	2013	PT	28	56	23.1	10.92	21.32	8.23
Tonosu J et al.	2019	PT	8	257	26.5	9.6	21.8	8.8
Murata S et al.	2022	PT	11	83	35.5	11.9	41.8	11.9
Kalidindi K et al.	2023	PT	34	320	19.75	6.78	18.8	8.1
Xu HW et al.	2024	PT	36	72	26.92	11.06	19.56	11.43
Cho DY et al.	2013	SS	28	56	33.07	12.11	34.71	7.95
Tonosu J et al.	2019	SS	8	257	31.3	7.8	28.3	8.8
Kalidindi K et al.	2023	SS	34	320	35.71	9.61	35.21	10.12
Yang P et al.	2023	SS	20	347	28.67	12.01	30.54	10.55
Xu HW et al.	2024	SS	36	72	28.63	11.37	29.29	13.82
Postoperative spondylopelvic parameters
Author	Year	subgroup	N	NN	SIJP Mean	SD	NoSIJP Mean	_SD
Cho DY et al.	2013	LL	28	56	43.23	14.28	46.14	10.28
Unoki E et al.	2019	LL	12	65	39	12.9	30.2431	15.9733
Tonosu J et al.	2019	LL	8	257	42	11.5	39.9	12.6
Murata S et al.	2022	LL	11	83	38.6	6.7	41.7	8.8
Kalidindi K et al.	2023	LL	34	320	50.73	11.47	65.86	7.59
Yang P et al.	2023	LL	20	347	37.93	11.58	41.96	12.32
Xu HW et al.	2024	LL	36	72	42.52	13.51	44.11	14.36
Cho DY et al.	2013	PI	28	56	56.84	12.39	55.52	11.78
Unoki E et al.	2019	PI	12	65	54.9	15.8	54.6538	10.9202
Tonosu J et al.	2019	PI	8	257	59.4	11.5	49.9	10.4
Murata S et al.	2022	PI	11	83	46.8	9.4	51	8.5
Kalidindi K et al.	2023	PI	34	320	57.33	11.46	57.18	9.8
Yang P et al.	2023	PI	20	347	50.38	14.36	55.87	11.84
Xu HW et al.	2024	PI	36	72	56.78	15.23	50.12	15.23
Cho DY et al.	2013	PT	28	56	20.13	10.12	15.23	8.21
Unoki E et al.	2019	PT	12	65	26.5	15	29.7415	12.7166
Tonosu J et al.	2019	PT	8	257	24.1	9.1	20.7	7.9
Murata S et al.	2022	PT	11	83	21	12.6	24.4	9
Kalidindi K et al.	2023	PT	34	320	24.93	9.02	19.49	5.65
Xu HW et al.	2024	PT	36	72	23.47	12.92	17.74	10.49
Cho DY et al.	2013	SS	28	56	36.75	8.23	40.31	7.33
Unoki E et al.	2019	SS	12	65	29.2	9.26	25.6446	10.2863
Tonosu J et al.	2019	SS	8	257	31.6	8.3	29.5	8.6
Kalidindi K et al.	2023	SS	34	320	36.42	6.64	38.83	10.59
Yang P et al.	2023	SS	20	347	31.54	9.86	32.85	9.03
Xu HW et al.	2024	SS	36	72	33.3	15.38	32.38	17.69

## Sheet: Pre-and postoperative control
Author	Year	subgroup	N	NN	Pre Mean	SD	Post Mean	_SD
Cho DY et al.	2013	LL	28	56	37.97	14.49	43.23	14.28
Tonosu J et al.	2019	LL	8	257	40.4	10.4	42	11.5
Murata S et al.	2022	LL	11	83	7.2	19.4	38.6	6.7
Kalidindi K et al.	2023	LL	34	320	46.46	10.38	50.73	11.47
Yang P et al.	2023	LL	20	347	30.96	14.76	37.93	11.58
Xu HWet al.	2024	LL	36	72	40.42	9.49	42.52	13.51
Cho DY et al.	2013	PI	28	56	56.94	13.02	56.84	12.39
Tonosu J et al.	2019	PI	8	257	59.6	12.2	59.4	11.5
Murata S et al.	2022	PI	11	83	47.1	11.3	46.8	9.4
Yang P et al.	2023	PI	20	347	55.73	12.9	50.38	14.36
Xu HWet al.	2024	PI	36	72	55.55	11.34	56.78	15.23
Cho DY et al.	2013	PT	28	56	23.1	10.92	20.13	10.12
Tonosu J et al.	2019	PT	8	257	26.5	9.6	24.1	9.1
Murata S et al.	2022	PT	11	83	35.5	11.9	21	12.6
Kalidindi K et al.	2023	PT	34	320	19.75	6.78	24.93	9.02
Xu HWet al.	2024	PT	36	72	26.92	11.06	23.47	12.92
Cho DY et al.	2013	SS	28	56	33.07	12.11	36.75	8.23
Tonosu J et al.	2019	SS	8	257	31.3	7.8	31.6	8.3
Kalidindi K et al.	2023	SS	34	320	35.71	9.61	36.42	6.64
Yang P et al.	2023	SS	20	347	28.67	12.01	31.54	9.86
Xu HWet al.	2024	SS	36	72	28.63	11.37	33.3	15.38
Author	Year	subgroup	N	NN	Pre Mean	SD	Post Mean	_SD
Cho DY et al.	2013	LL	56	56	38.13	14.03	46.14	10.28
Tonosu J et al.	2019	LL	257	257	36.8	14.1	39.9	12.6
Murata S et al.	2022	LL	83	83	5.2	22.5	41.7	8.8
Kalidindi K et al.	2023	LL	320	320	62.25	7.34	65.86	7.59
Yang P et al.	2023	LL	347	347	37.68	36.4	41.96	12.32
Xu HWet al.	2024	LL	72	72	41.02	11.85	44.11	14.36
Cho DY et al.	2013	PI	56		55.48	12.24	55.52	11.78
Tonosu J et al.	2019	PI	257		49.9	10.4	49.9	10.4
Murata S et al.	2022	PI	83		50.8	9.7	51	8.5
Yang P et al.	2023	PI	347	347	55.43	14.57	55.87	11.84
Xu HWet al.	2024	PI	72	72	48.85	13.5	50.12	15.23
Cho DY et al.	2013	PT	56		21.32	8.23	15.23	8.21
Tonosu J et al.	2019	PT	257		21.8	8.8	20.7	7.9
Murata S et al.	2022	PT	83		41.8	11.9	24.4	9
Kalidindi K et al.	2023	PT	320		18.8	8.1	19.49	5.65
Xu HWet al.	2024	PT	72	72	19.56	11.43	17.74	10.49
Cho DY et al.	2013	SS	56	56	34.71	7.95	40.31	7.33
Tonosu J et al.	2019	SS	257	257	28.3	8.8	29.5	8.6
Kalidindi K et al.	2023	SS	320	320	35.21	10.12	38.83	10.59
Yang P et al.	2023	SS	347	347	30.54	10.55	32.85	9.03
Xu HWet al.	2024	SS	72	72	29.29	13.82	32.38	17.69
